# Supplementary material for: A Review of Non-Invasive Sampling in Wildlife Disease and Health Research: What’s New?
Source: MDPI journal article supplement (doi:10.3390/ani12131719), 2022-07-02
Supplement: s1 [file s1]

## Supplementary Material

*Review*

# A review of non-invasive sampling in wildlife disease and health research: what's new?

Anna-Katarina Schilling <sup>1,†</sup>, Maria Vittoria Mazzamuto <sup>2,3,†</sup> and Claudia Romeo <sup>4,\*</sup>

<sup>1</sup> Veterinarian practitioner; annakatarinaschilling@gmail.com

<sup>2</sup> Haub School of Environment and Natural Resources, University of Wyoming, 1000 E. University Ave, Laramie, WY, 82072, USA; mariavittoria.mazzamuto@uwyo.edu

<sup>3</sup> Department of Theoretical and Applied Sciences, University of Insubria, Via J.H. Dunant 3, 21100, Varese, Italy

<sup>4</sup> Istituto Zooprofilattico Sperimentale della Lombardia e dell'Emilia Romagna (IZSLER), via Bianchi 9, 25124, Brescia, Italy; claudiarosa.romeo@izsler.it

<sup>†</sup> these two authors equally contributed

<sup>\*</sup> Correspondence: claudiarosa.romeo@izsler.it

**Table S1.** Number and percentage of papers published per topic.

| Topic                  | N  | %     |
|------------------------|----|-------|
| Stress                 | 67 | 24.63 |
| Physiology             | 42 | 15.44 |
| Virus                  | 29 | 10.66 |
| Helminths              | 20 | 7.35  |
| Reproductive condition | 18 | 6.62  |
| Pollutants             | 14 | 5.15  |
| Bacteria               | 14 | 5.15  |
| Disease                | 13 | 4.78  |
| Other                  | 12 | 4.41  |
| Fungi                  | 8  | 2.94  |
| Immunity               | 8  | 2.94  |
| Endoparasites          | 8  | 2.94  |
| Protozoa               | 8  | 2.94  |
| Ectoparasites          | 6  | 2.20  |
| Diet                   | 5  | 1.83  |

**Table S2.** Number and percentage of papers published per biological material collected (21 NA removed).

| Biological material collected | N   | %     |
|-------------------------------|-----|-------|
| Faeces                        | 126 | 50.00 |
| Saliva and other body fluids  | 34  | 13.55 |
| Hair-feathers-skin            | 25  | 9.96  |
| Several                       | 19  | 7.56  |
| Imaging and remote sensing    | 22  | 8.76  |
| Urine                         | 19  | 7.56  |
| Invertebrates                 | 6   | 2.39  |

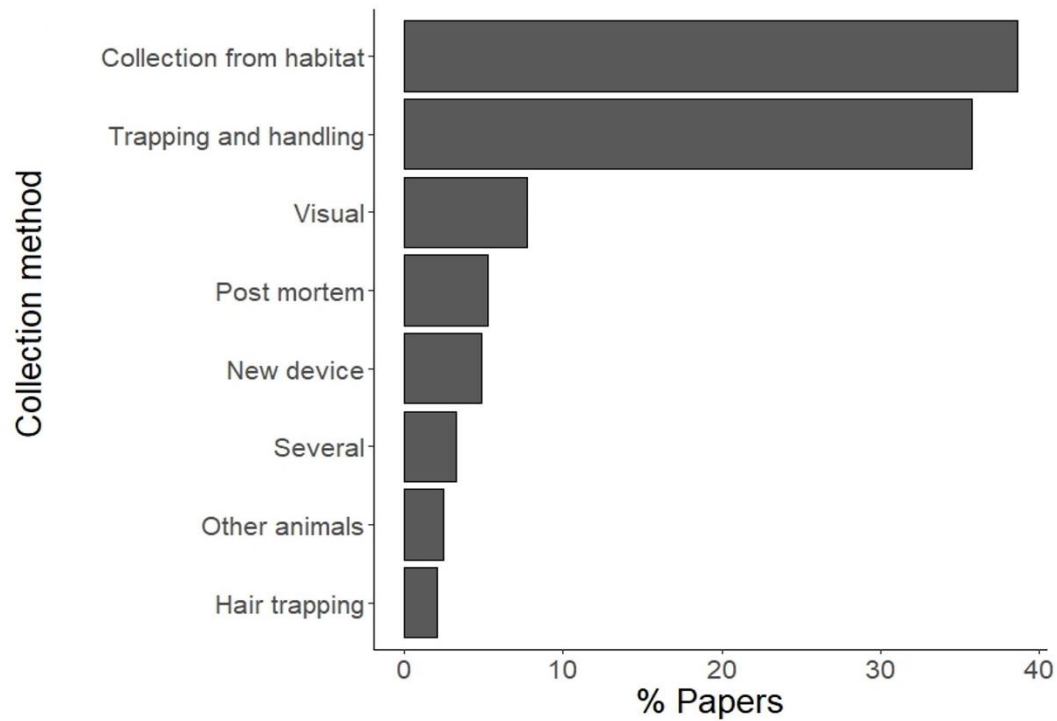

**Figure S1.** Percentage of published articles classified based on method used to collect samples.

**Table S3.** Number and percentage of papers published per biological material collection method (26 NA removed)

| Biological material collection method | N  | %     |
|---------------------------------------|----|-------|
| Collection from habitat               | 95 | 38.62 |
| Trapping and handling                 | 89 | 35.77 |
| Visual                                | 19 | 7.72  |
| Post mortem                           | 13 | 5.28  |
| New device                            | 12 | 4.87  |
| Several                               | 8  | 3.25  |
| Other animals                         | 6  | 2.43  |
| Hair trapping                         | 5  | 2.03  |

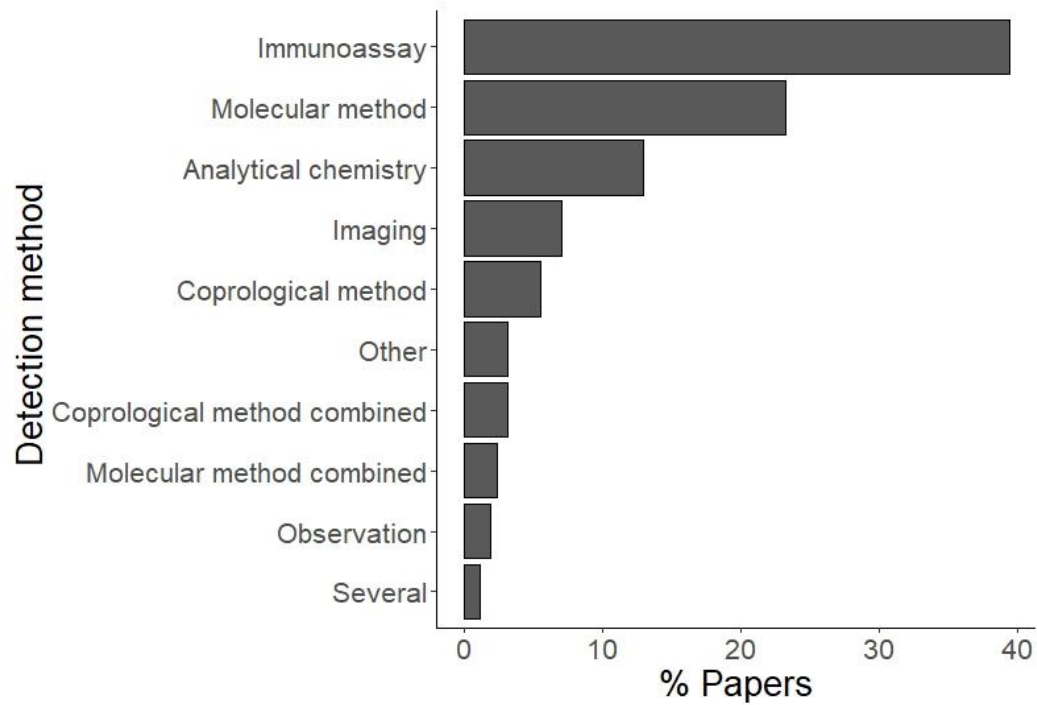

**Figure S2.** Percentage of published articles classified based on detection method.

**Table S4.** Number and percentage of papers published per detection method (18 NA removed).

| Detection method             | N   | %     |
|------------------------------|-----|-------|
| Immunoassay                  | 100 | 39.37 |
| Molecular method             | 59  | 23.22 |
| Analytical chemistry         | 34  | 12.99 |
| Imaging                      | 18  | 7.09  |
| Coprological method          | 14  | 5.51  |
| Coprological method combined | 8   | 3.15  |
| Molecular method combined    | 6   | 2.36  |
| Observation                  | 5   | 1.96  |
| Other                        | 4   | 3.15  |
| Several                      | 3   | 1.18  |

**Table S5.** Percentage contribution to Chi-squared independence test biological material sample collected – Host's taxon.

|                                     | <b>Amphibia</b> | <b>Aves</b> | <b>Fish</b> | <b>Mammalia</b> | <b>Marine mammal</b> | <b>Reptilia</b> |
|-------------------------------------|-----------------|-------------|-------------|-----------------|----------------------|-----------------|
| <b>Faeces</b>                       | 3.935           | 0.104       | 1.041       | 1.366           | 2.52                 | 0.471           |
| <b>Hair-feathers-skin</b>           | 0.974           | 3.046       | 0.195       | 0.003           | 0.909                | 0.112           |
| <b>Imaging and remote sensing</b>   | 0.762           | 0.081       | 0.152       | 0.319           | 2.484                | 2.838           |
| <b>Invertebrates</b>                | 0.254           | 0.356       | 0.051       | 0.037           | 0.237                | 2.661           |
| <b>Saliva and other body fluids</b> | 38.07           | 2.015       | 10.669      | 7.282           | 12.499               | 0               |
| <b>Several</b>                      | 0.762           | 0.081       | 0.152       | 0.11            | 0.001                | 0.356           |
| <b>Urine</b>                        | 0.019           | 1.126       | 0.161       | 0.663           | 0.751                | 0.375           |

**Table S6.** Percentage contribution to Chi-squared independence test Topic – Biological material sample collected.

|                               | <b>Faeces</b> | <b>Hair-feathers-skin</b> | <b>Imaging and remote sensing</b> | <b>Invertebrates</b> | <b>Saliva and other body fluids</b> | <b>Several</b> | <b>Urine</b> |
|-------------------------------|---------------|---------------------------|-----------------------------------|----------------------|-------------------------------------|----------------|--------------|
| <b>Bacteria</b>               | 0.074         | 0.536                     | 0.42                              | 0.14                 | 1.86                                | 0.35           | 0.004        |
| <b>Diet</b>                   | 0             | 0.402                     | 0.661                             | 0.04                 | 0.227                               | 0.12           | 0.127        |
| <b>Disease</b>                | 1.229         | 0.23                      | 5.834                             | 1.945                | 0.011                               | 0.18           | 0.236        |
| <b>Ectoparasites</b>          | 1.229         | 0.128                     | 5.834                             | 0.06                 | 0.011                               | 0.273          | 0.19         |
| <b>Endoparasites</b>          | 1.509         | 0.307                     | 0.24                              | 0.08                 | 0.453                               | 0.24           | 0.253        |
| <b>Fungi</b>                  | 0.935         | 0.307                     | 0.109                             | 0.08                 | 8.441                               | 0.24           | 0.253        |
| <b>Helminths</b>              | 1.645         | 0.728                     | 0.57                              | 0.19                 | 1.076                               | 0.05           | 0.068        |
| <b>Immunity</b>               | 0.037         | 0.268                     | 0.21                              | 0.07                 | 0.396                               | 0.21           | 8.65         |
| <b>Other</b>                  | 0.037         | 0.066                     | 0.21                              | 1.571                | 0                                   | 0.175          | 0.222        |
| <b>Physiology</b>             | 0.184         | 0.216                     | 4.455                             | 0.35                 | 0.305                               | 0.295          | 0.008        |
| <b>Pollutants</b>             | 1.115         | 21.629                    | 0.36                              | 0.12                 | 0.68                                | 0.005          | 0.38         |
| <b>Protozoa</b>               | 0.001         | 0.804                     | 0.24                              | 1.293                | 0.453                               | 0.109          | 0.253        |
| <b>Reproductive condition</b> | 0.99          | 0.575                     | 0.45                              | 0.15                 | 0.85                                | 0.45           | 1.121        |
| <b>Stress</b>                 | 1.211         | 0.068                     | 1.889                             | 0.63                 | 0.201                               | 0.248          | 0.711        |
| <b>Virus</b>                  | 0.913         | 0.085                     | 0.005                             | 2.886                | 0.358                               | 0.623          | 0.089        |
